# Supplementary material
Source: publisher site journal article supplement (https://www.dovepress.com/article/319796)
Supplement: Supplementary file 1 [file get_supplementary_file.php]

# Supplementary Materials

**Table S1. Patient Demographic and Clinical Characteristics**

| **Characteristic** | **Statistic or Category** | **amlodipine and atorvastin** | **celecoxib** | **tolterodine** | **tolterodine long-acting** |
| --- | --- | --- | --- | --- | --- |
| **(N = 12,097)** | **(N = 80,054)** | **(N = 1,812)** | **(N = 12,732)** |
| **Age** | Mean (SD) | 58.99 (9.34) | 56.08 (10.73) | 60.33 (13.16) | 59.36 (11.84) |
| Median (Q1 to Q3) | 59.0 (53.0 to 64.0) | 57.0 (51.0 to 62.0) | 60.0 (52.0 to 71.0) | 59.0 (52.0 to 66.0) |
| Range | 22.0 to 77.0 | 18.0 to 80.0 | 18.0 to 78.0 | 18.0 to 80.0 |
| **Gender, N (%)** | Female | 3,902 (32.3%) | 47,604 (59.5%) | 1,515 (83.6%) | 10,873 (85.4%) |
| Male | 8,194 (67.7%) | 32,449 (40.5%) | 297 (16.4%) | 1,859 (14.6%) |
| Unknown | 1 (0.0%) | 1 (0.0%) |  |  |
| **Region, N (%)** | Northeast | 2,657 (22.0%) | 16,011 (20.1%) | 416 (23.1%) | 2,807 (22.2%) |
| Midwest | 4,014 (33.3%) | 19,486 (24.5%) | 729 (40.4%) | 4,885 (38.6%) |
| South | 4,901 (40.6%) | 37,420 (47.0%) | 447 (24.8%) | 3,654 (28.8%) |
| West | 492 (4.1%) | 6,751 (8.5%) | 212 (11.8%) | 1,320 (10.4%) |
| **Health Plan, N (%)** | Commercial | 7,353 (60.8%) | 42,587 (53.2%) | 969 (53.5%) | 6,416 (50.4%) |
| Governmental | 269 (2.2%) | 2,843 (3.6%) | 220 (12.1%) | 1,126 (8.8%) |
| Self-Insured | 4,393 (36.3%) | 33,651 (42.0%) | 613 (33.8%) | 5,106 (40.1%) |
| Unknown/Missing/Other | 82 (0.7%) | 973 (1.2%) | 10 (0.6%) | 84 (0.7%) |
| **Charlson Comorbidity Index, N (%)** | 0 | 6,827 (56.4%) | 49,016 (61.2%) | 996 (55.0%) | 7,570 (59.5%) |
| 1 | 3,360 (27.8%) | 20,366 (25.4%) | 433 (23.9%) | 2,919 (22.9%) |
| 2 | 808 (6.7%) | 5,484 (6.9%) | 170 (9.4%) | 993 (7.8%) |
| 3+ | 1,102 (9.1%) | 5,188 (6.5%) | 213 (11.8%) | 1,250 (9.8%) |

**Table S1. Patient Demographic and Clinical Characteristics (Continued)**

| **Characteristic** | **Statistic or Category** | **phenytoin** | **ziprasidone** | **atorvastatin** | **desvenlafaxine** |
| --- | --- | --- | --- | --- | --- |
| **(N = 869)** | **(N = 6,697)** | **(N = 353,504)** | **(N = 25,541)** |
| **Age** | Mean (SD) | 52.36 (14.61) | 43.50 (14.33) | 59.69 (9.55) | 47.48 (11.88) |
| Median (Q1 to Q3) | 54.0 (44.0 to 62.0) | 45.0 (33.0 to 54.0) | 60.0 (54.0 to 65.0) | 49.0 (40.0 to 56.0) |
| Range | 18.0 to 78.0 | 18.0 to 78.0 | 18.0 to 77.0 | 18.0 to 80.0 |
| **Gender, N (%)** | Female | 418 (48.1%) | 4,618 (69.0%) | 141,267 (40.0%) | 19,418 (76.0%) |
| Male | 451 (51.9%) | 2,079 (31.0%) | 212,218 (60.0%) | 6,123 (24.0%) |
| Unknown |  |  | 19 (0.0%) | 3,448 (13.6%) |
| **Region, N (%)** | Northeast | 239 (27.8%) | 2,148 (32.7%) | 124,806 (35.5%) | 6,045 (23.8%) |
| Midwest | 311 (36.2%) | 1,899 (28.9%) | 112,969 (32.2%) | 0 (0.0%) |
| South | 244 (28.4%) | 1,952 (29.7%) | 92,385 (26.3%) | 13,824 (54.4%) |
| West | 66 (7.7%) | 575 (8.7%) | 21,160 (6.0%) | 2,103 (8.3%) |
| **Health Plan, N (%)** | Commercial | 513 (59.0%) | 3,846 (57.4%) | 199,832 (56.5%) | 15,035 (58.9%) |
| Governmental | 72 (8.3%) | 939 (14.0%) | 20,156 (5.7%) | 538 (2.1%) |
| Self-Insured | 275 (31.6%) | 1,878 (28.0%) | 129,913 (36.8%) | 9,773 (38.3%) |
| Unknown/Missing/Other | 9 (1.0%) | 34 (0.5%) | 3,603 (1.0%) | 195 (0.8%) |
| **Charlson Comorbidity Index, N (%)** | 0 | 568 (65.4%) | 4,338 (64.8%) | 190,947 (54.0%) | 18,753 (73.4%) |
| 1 | 146 (16.8%) | 1,518 (22.7%) | 95,502 (27.0%) | 4,791 (18.8%) |
| 2 | 65 (7.5%) | 425 (6.3%) | 28,793 (8.1%) | 977 (3.8%) |
| 3+ | 90 (10.4%) | 416 (6.2%) | 38,262 (10.8%) | 1,020 (4.0%) |

**Table S1. Patient Demographic and Clinical Characteristics (Continued)**

| **Characteristic** | **Statistic or Category** | **sirolimus** | **eletriptan** | **sildenafil (PAH)** | **dofetilide** |
| --- | --- | --- | --- | --- | --- |
| **(N = 1,224)** | **(N = 12,944)** | **(N = 759)** | **(N = 2,531)** |
| **Age** | Mean (SD) | 50.37 (13.40) | 46.77 (10.76) | 57.55 (12.70) | 61.77 (9.62) |
| Median (Q1 to Q3) | 53.0 (42.5 to 60.0) | 48.0 (40.0 to 55.0) | 59.0 (50.0 to 65.0) | 62.0 (56.0 to 67.0) |
| Range | 18.0 to 79.0 | 18.0 to 83.0 | 18.0 to 78.0 | 22.0 to 82.0 |
| **Gender, N (%)** | Female | 470 (38.4%) | 11,425 (88.3%) | 473 (62.3%) | 695 (27.5%) |
| Male | 754 (61.6%) | 1,519 (11.7%) | 286 (37.7%) | 1,836 (72.5%) |
| Unknown |  |  |  |  |
| **Region, N (%)** | Northeast | 336 (27.7%) | 2,306 (17.8%) | 170 (22.5%) | 792 (31.4%) |
| Midwest | 381 (31.4%) | 3,228 (24.9%) | 226 (30.0%) | 616 (24.4%) |
| South | 358 (29.5%) | 6,207 (48.0%) | 252 (33.4%) | 880 (34.9%) |
| West | 138 (11.4%) | 1,203 (9.3%) | 106 (14.1%) | 233 (9.2%) |
| **Health Plan, N (%)** | Commercial | 722 (59.0%) | 7,308 (56.5%) | 442 (58.2%) | 1,401 (55.4%) |
| Governmental | 69 (5.6%) | 43 (0.3%) | 60 (7.9%) | 224 (8.9%) |
| Self-Insured | 413 (33.7%) | 5,384 (41.6%) | 256 (33.7%) | 835 (33.0%) |
| Unknown/Missing/Other | 20 (1.6%) | 209 (1.6%) | 1 (0.1%) | 71 (2.8%) |
| **Charlson Comorbidity Index, N (%)** | 0 | 235 (19.2%) | 9,960 (76.9%) | 115 (15.2%) | 958 (37.9%) |
| 1 | 135 (11.0%) | 2,146 (16.6%) | 195 (25.7%) | 750 (29.6%) |
| 2 | 311 (25.4%) | 517 (4.0%) | 156 (20.6%) | 330 (13.0%) |
| 3+ | 543 (44.4%) | 321 (2.5%) | 293 (38.6%) | 493 (19.5%) |

**Table S1. Patient Demographic and Clinical Characteristics (Continued)**

| **Characteristic** | **Statistic or Category** | **sildenafil (MH)** | **latanoprost** |
| --- | --- | --- | --- |
| **(N = 51,252)** | **(N = 51,359)** |
| **Age** | Mean (SD) | 55.60 (8.88) | 64.55 (10.60) |
| Median (Q1 to Q3) | 56.0 (50.0 to 62.0) | 64.0 (58.0 to 76.0) |
| Range | 18.0 to 83.0 | 18.0 to 77.0 |
| **Gender, N (%)** | Female | 86 (0.2%) | 27,623 (53.8%) |
| Male | 51,166 (99.8%) | 23,730 (46.2%) |
| Unknown |  | 6 (0.0%) |
| **Region, N (%)** | Northeast | 19,200 (37.5%) | 14,532 (28.6%) |
| Midwest | 14,439 (28.2%) | 16,745 (33.0%) |
| South | 14,945 (29.2%) | 15,796 (31.1%) |
| West | 2,668 (5.2%) | 3,679 (7.2%) |
| **Health Plan, N (%)** | Commercial | 23,356 (45.6%) | 24,219 (47.2%) |
| Governmental | 445 (0.9%) | 4,776 (9.3%) |
| Self-Insured | 26,251 (51.2%) | 22,038 (42.9%) |
| Unknown/Missing/Other | 1,200 (2.3%) | 326 (0.6%) |
| **Charlson Comorbidity Index, N (%)** | 0 | 34,058 (66.5%) | 28,954 (56.4%) |
| 1 | 10,312 (20.1%) | 12,081 (23.5%) |
| 2 | 2,832 (5.5%) | 4,216 (8.2%) |
| 3+ | 4,050 (7.9%) | 6,108 (11.9%) |

**Table S2. Switch Rates from AG or Non-AG to Brand-Name Products Regardless of Prior Exposure**

| Therapeutic Area | Treatment | AG Users | | Non-AG Users | |
| --- | --- | --- | --- | --- | --- |
| N | Switch to Brand, N(%) | N | Switch to Brand, N(%) |
| Ophthalmology | latanoprost | 44,032 | 403 (0.9%) | 114,611 | 971 (0.8%) |
| Cardiovascular | amlodipine and atorvastatin | 812 | 10 (1.2%) | 10,324 | 667 (6.5%) |
| atorvastatin | 177,977 | 264 (0.1%) | 1,549,872 | 12,325 (0.8%) |
| dofetilide | 799 | 36 (4.5%) | 1,717 | 106 (6.2%) |
| CNS | phenytoin | 572 | 30 (5.2%) | 618 | 40 (6.5%) |
| venlafaxine | 17,052 | 387 (2.3%) | 447,951 | 6,922 (1.5%) |
| ziprasidone | 2,729 | 43 (1.6%) | 20,160 | 187 (0.9%) |
| gabapentin | 167,147 | 275 (0.2%) | 1,505,160 | 1,100 (0.1%) |
| desvenlafaxine | 3,828 | 218 (5.7%) | 18,825 | 755 (4.0%) |
| eletriptan | 4,477 | 156 (3.5%) | 8,313 | 296 (3.6%) |
| alprazolam | 362,611 | 949 (0.3%) | 1,807,427 | 3,402 (0.2%) |
| Men’s Health | sildenafil | 12,210 | 305 (2.5%) | 18,678 | 491 (2.6%) |
| Urinary | tolterodine | 9,174 | 40 (0.4%) | 3,417 | 8 (0.2%) |
| tolterodine extended release | 16,134 | 414 (2.6%) | 21,721 | 180 (0.8%) |
| Pain | celecoxib | 26,557 | 295 (1.1%) | 238,646 | 1,712 (0.7%) |
| Immunosuppression | sirolimus | 968 | 32 (3.3%) | 602 | 23 (3.8%) |

*Note: AG=authorized generics; non-AG= non-authorized generics*

**Table S3. Adherence of People who had a Switchback Versus People without Switchback**

| Therapeutic Area | Treatment | Any Switchback | | No Switchback | |
| --- | --- | --- | --- | --- | --- |
| N | PDC during the Switchback period Mean (SD) | N | PDC in the 1st montha,  Mean (SD) |
| Ophthalmology | latanoprost | 682 | 0.87 (0.22) | 37,405 | 0.94 (0.13) |
| Cardiovascular | amlodipine and atorvastatin | 443 | 0.93 (0.13) | 7,193 | 1.00 (0.06) |
| atorvastatin | 5,838 | 0.92 (0.17) | 239,230 | 1.00 (0.05) |
| dofetilide | 105 | 0.92 (0.16) | 1,409 | 1.00 (0.05) |
| sildenafil | 15 | 0.90 (0.23) | 473 | 0.99 (0.06) |
| CNS | phenytoin | 35 | 0.95 (0.08) | 312 | 1.00 (0.08) |
| ziprasidone | 178 | 0.94 (0.15) | 4,180 | 0.99 (0.08) |
| desvenlafaxine | 217 | 0.93 (0.14) | 3,700 | 1.00 (0.05) |
| eletriptan | 188 | 0.69 (0.32) | 6,776 | 0.72 (0.33) |
| Men’s Health | sildenafil | 221 | 0.74 (0.31) | 17,280 | 0.71 (0.36) |
| Urinary | tolterodine | 28 | 0.96 (0.10) | 850 | 0.99 (0.08) |
| tolterodine long-acting | 245 | 0.95 (0.09) | 7,018 | 1.00 (0.05) |
| Pain | celecoxib | 794 | 0.91 (0.16) | 44,111 | 0.99 (0.09) |
| Immunosuppression | sirolimus | 38 | 0.97 (0.09) | 489 | 1.00 (0.06) |

a1st month refers to the first month since switching from branded to generics/authorized generics
